# Supplementary material for: Metabolic Syndrome and Risk of Endometrial Cancer in the United States: A Study in the SEER–Medicare Linked Database
Source: Oxford University Press journal article supplement (doi:10.1158/1055-9965.epi-14-0923), 2015-01-01
Supplement: 10559965epi140923-sup-135994_1_supp_0_ndys14.doc [file 10559965epi140923-sup-135994_1_supp_0_ndys14.doc]

| **Supplemental Table 1.** Medicare claims data code definitions used to define metabolic syndrome factors. | |
| --- | --- |
| Factor | Code-based definitions |
| Overweight/obesity | A diagnosis of unspecified or overweight/obesity/morbid obesity or central adiposity (specifically ICD-9: 278, 278.0, 278.00, 278.01, 278.02, 278.03, 278.1, V77.8a)  aCode for central adiposity (V77.8) only available from 2001-2007 |
| Impaired fasting glucose | A diagnosis of type 2 diabetes or impaired fasting glucose (ICD-9: 250.X0, 250.X2, 790.2, 790.21, 790.22, 790.29)b  bCodes 250, 250.X were not included because they generically reference both type 1 and 2 diabetes, and codes 250.X1 and 250.X3 were not included because they also include type 1 diabetes |
| High blood pressure | A diagnosis of hypertensive disease (ICD-9: 401-405) |
| Low HDL cholesterol | A diagnosis of lipoprotein deficiency (ICD-9: 272.5, 272.5X) |
| High triglycerides | A diagnosis of pure hyperglycemia, mixed hyperlipidemia, hyperchylomicronemia, or other unspecified hyperlipidemia (ICD-9: 272.1, 272.1X, 272.2, 272.2X, 272.3, 272.3X, 272.4, 272.4X)c cCodes 272, 272.0, 272.0X are not included |
| Dysmetabolic syndrome | A diagnosis of metabolic syndrome (ICD-9: 277.7, started use in 2001) |
